# Supplementary material for: Measurement of organic and elemental carbon in downtown Rome and background area: physical behavior and chemical speciation
Source: Royal Society of Chemistry journal article supplement (doi:10.1039/c4em00471j), 2014-09-30

## **Electronic Supplementary Information**

### **MEASUREMENTS OF ORGANIC AND ELEMENTAL CARBON IN DOWNTOWN ROME AND BACKGROUND AREA: PHYSICAL BEHAVIOR AND CHEMICAL SPECIATION**

Pasquale Avino<sup>1\*</sup>, Maurizio Manigrasso<sup>1</sup>, Alberto Rosada<sup>2</sup>, Alessandro Dodaro<sup>2</sup>

<sup>1</sup>DIPIA, INAIL, via IV Novembre 144, 00187 Rome, Italy

<sup>2</sup>ENEA, R.C.-Casaccia, via Anguillarese 301, 00060 Rome, Italy

\*Corresponding author: Pasquale Avino, DIPIA, INAIL settore Ricerca, via IV Novembre 144, 00187 Rome (Italy). Ph.: +39 06 97892611; Fax: +39 06 97891; E-mail: p.avino@inail.it.

Table 1. Nuclear data and Limit of Detection (LOD) of the elements determined by INAA. (m: minutes; h: hours; d: days; y: years).

| Element | Product nuclide    | Cross Section <sup>41</sup><br>(barn) | Half life |   | $\gamma$ -Ray used<br>(keV) | LOD <sup>a</sup><br>(ng m <sup>-3</sup> ) |
|---------|--------------------|---------------------------------------|-----------|---|-----------------------------|-------------------------------------------|
| Ag      | <sup>110m</sup> Ag | 4.5                                   | 249.9     | d | 657.7                       | 0.06                                      |
| As      | <sup>76</sup> As   | 4.3                                   | 1.096     | d | 559.2                       | 1                                         |
| Au      | <sup>198</sup> Au  | 98.8                                  | 2.697     | d | 411.8                       | 0.001 <sup>a</sup>                        |
| Ba      | <sup>131</sup> Ba  | 13.5                                  | 11.8      | d | 496.3                       | 5                                         |
| Br      | <sup>82</sup> Br   | 2.69                                  | 1.47      | d | 776.5                       | 0.5                                       |
| Ca      | <sup>47</sup> Sc   | 0.70                                  | 3.42      | d | 159.8                       | 300                                       |
| Cd      | <sup>115m</sup> In | 300                                   | 53.38     | h | 527.8                       | 0.3                                       |
| Ce      | <sup>141</sup> Ce  | 0.57                                  | 32.38     | d | 145.4                       | 0.05                                      |
| Co      | <sup>60</sup> Co   | 37.2                                  | 5.272     | y | 1332.5                      | 0.01                                      |
| Cr      | <sup>51</sup> Cr   | 15.9                                  | 27.7      | d | 320.0                       | 0.2                                       |
| Cs      | <sup>134</sup> Cs  | 29.0                                  | 2.062     | y | 795.7                       | 0.02                                      |
| Eu      | <sup>152</sup> Eu  | 5900                                  | 12.7      | y | 1408.0                      | 0.01                                      |
| Fe      | <sup>59</sup> Fe   | 1.15                                  | 45.1      | d | 1099.2                      | 50                                        |
| Hf      | <sup>181</sup> Hf  | 12.6                                  | 42.5      | d | 482.2                       | 0.01                                      |
| Hg      | <sup>203</sup> Hg  | 3.8                                   | 46.59     | d | 279.0                       | 0.02                                      |
| K       | <sup>42</sup> K    | 1.46                                  | 12.36     | h | 1524.7                      | 50                                        |
| La      | <sup>140</sup> La  | 9.0                                   | 40.27     | h | 1596.2                      | 0.1                                       |
| Mg      | <sup>27</sup> Mg   | 0.0382                                | 9.46      | m | 1014.1                      | 50                                        |
| Mn      | <sup>56</sup> Mn   | 13.3                                  | 2.576     | h | 1810.7                      | 0.5                                       |
| Mo      | <sup>99</sup> Mo   | 0.45                                  | 2.76      | d | 141.0                       | 0.2                                       |
| Na      | <sup>24</sup> Na   | 0.53                                  | 15.0      | h | 1368.4                      | 100                                       |
| Nd      | <sup>147</sup> Nd  | 1.3                                   | 11.06     | d | 531.0                       | 1 <sup>a</sup>                            |
| Ni      | <sup>58</sup> Co   | 0.113                                 | 70.78     | d | 810.7                       | 1                                         |
| Rb      | <sup>86</sup> Rb   | 72.1                                  | 18.66     | d | 1076.7                      | 1                                         |
| Sb      | <sup>122</sup> Sb  | 6.25                                  | 2.70      | d | 564.0                       | 0.2                                       |
| Sc      | <sup>46</sup> Sc   | 26.5                                  | 83.85     | d | 889.2                       | 0.003                                     |
| Se      | <sup>75</sup> Se   | 51.8                                  | 120.4     | d | 264.6                       | 0.1                                       |
| Sm      | <sup>153</sup> Sm  | 206                                   | 1.948     | d | 103.1                       | 0.41 <sup>b</sup>                         |
| Th      | <sup>233</sup> Pa  | 7.40                                  | 27.4      | d | 311.8                       | 0.1                                       |
| V       | <sup>52</sup> V    | 4.88                                  | 3.75      | m | 1434.4                      | 1                                         |
| W       | <sup>187</sup> W   | 37.8                                  | 23.9      | h | 685.7                       | 0.01 <sup>a</sup>                         |
| Yb      | <sup>175</sup> Yb  | 65                                    | 4.19      | d | 396.1                       | 0.01 <sup>a</sup>                         |
| Zn      | <sup>65</sup> Zn   | 0.78                                  | 243.8     | d | 1115.5                      | 0.5                                       |

<sup>a</sup>Calculating according to [42].

<sup>b</sup>The values are expressed as ppb (ng g<sup>-1</sup>)

Table 2. Results (mean  $\pm$  standard deviation) of INAA quality control on IAEA air filter and USGS GRX-1 Standard Reference Materials ( $\mu\text{g g}^{-1}$ ). The “measured value” is the average of seven determinations on seven different replicates (n.d. = not determined; - = absent in the Standard Reference Material).

|    | IAEA air filter |           | USGS GRX-1       |                  |
|----|-----------------|-----------|------------------|------------------|
|    | measured        | certified | measured         | certified        |
| As | 4.9 $\pm$ 0.5   | 5.6       | 456 $\pm$ 9      | 460 $\pm$ 30     |
| Au | 1.26 $\pm$ 0.10 | 1.15      | n.d.             | -                |
| Ba | 43.4 $\pm$ 0.5  | 53.8      | n.d.             | -                |
| Cd | 10.6 $\pm$ 1.0  | 9.96      | n.d.             | -                |
| Co | 1.3 $\pm$ 0.1   | 1.12      | 6.3 $\pm$ 0.2    | 9.3 $\pm$ 1.1    |
| Cr | 4.7 $\pm$ 0.8   | 5.6       | 11 $\pm$ 1       | 10 $\pm$ 2       |
| Cs | n.d.            | -         | 1.6 $\pm$ 0.4    | 4.0 $\pm$ 1.1    |
| Cu | 51.6 $\pm$ 0.5  | 48.8      | n.d.             | -                |
| Eu | n.d.            | -         | 0.60 $\pm$ 0.05  | 0.68 $\pm$ 0.07  |
| Fe | 193 $\pm$ 17    | 207.9     | 25000 $\pm$ 2000 | 24700 $\pm$ 1800 |
| Hg | 0.96 $\pm$ 0.07 | 1.00      | n.d.             | -                |
| La | n.d.            | -         | 5.7 $\pm$ 0.6    | 6.1 $\pm$ 0.3    |
| Mn | 31.2 $\pm$ 1.0  | 31.9      | n.d.             | -                |
| Mo | 1.26 $\pm$ 0.2  | 1.14      | n.d.             | -                |
| Na | n.d.            | -         | 498 $\pm$ 21     | 550 $\pm$ 110    |
| Ni | 7.6 $\pm$ 0.5   | 8.0       | 44 $\pm$ 6       | 42 $\pm$ 10      |
| Sb | n.d.            | -         | 152 $\pm$ 6      | 124 $\pm$ 6      |
| Se | 1.01 $\pm$ 0.10 | 1.06      | 20.2 $\pm$ 0.5   | 18.6 $\pm$ 0.8   |
| Sm | n.d.            | -         | 9.7 $\pm$ 3.9    | 10 $\pm$ 2       |
| U  | 0.78 $\pm$ 0.10 | 1.02      | n.d.             | -                |
| V  | 8.04 $\pm$ 0.35 | 8.00      | n.d.             | -                |
| Yb | n.d.            | -         | 2.1 $\pm$ 0.3    | 1.8 $\pm$ 0.5    |
| Zn | 132 $\pm$ 18    | 152       | 681 $\pm$ 49     | 740 $\pm$ 110    |

Figure 1. Master scheme for INAA investigation of samples and standards.

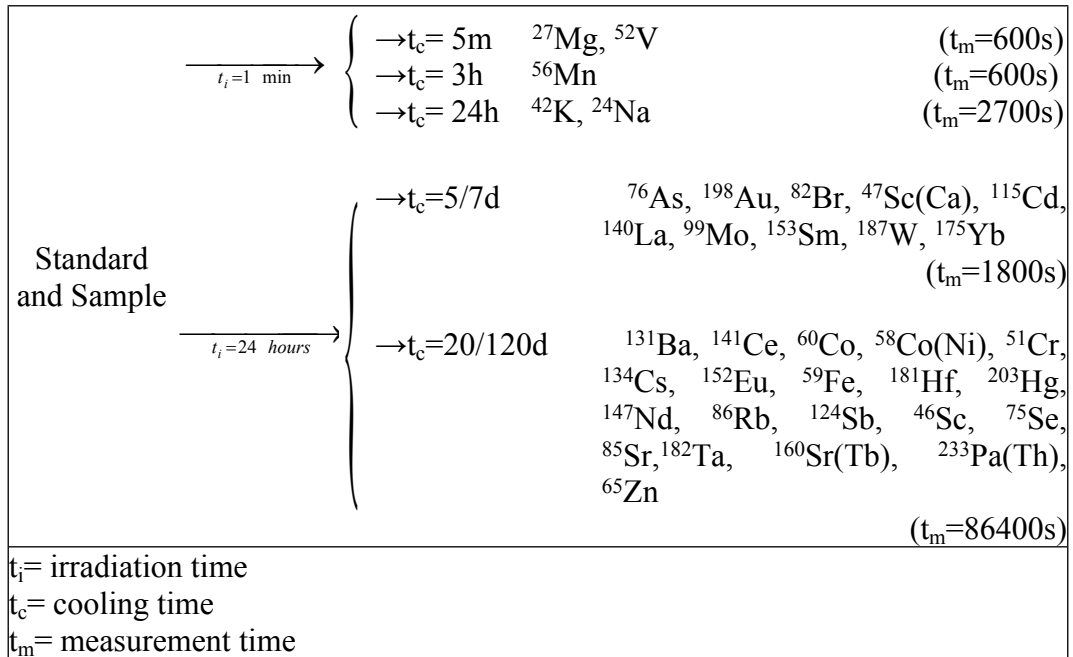

Figure 2. Master scheme of the analytical procedure for the separation of *n*-alkanes, *n*-alkanoic acids and PAHs in the fine organic particulate matter.

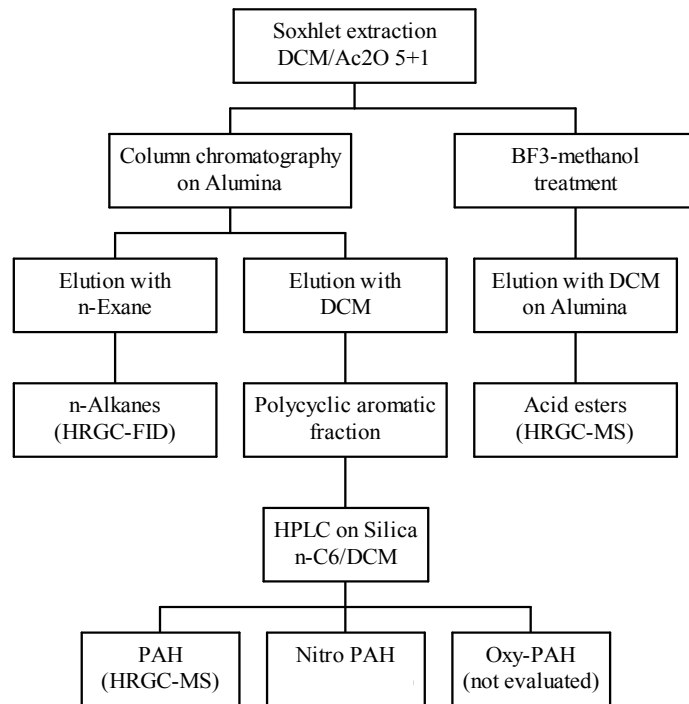

Figure 3. Daily evolution of primary gas pollutants (CO and benzene) and carbon particles along with the Radon modulation.

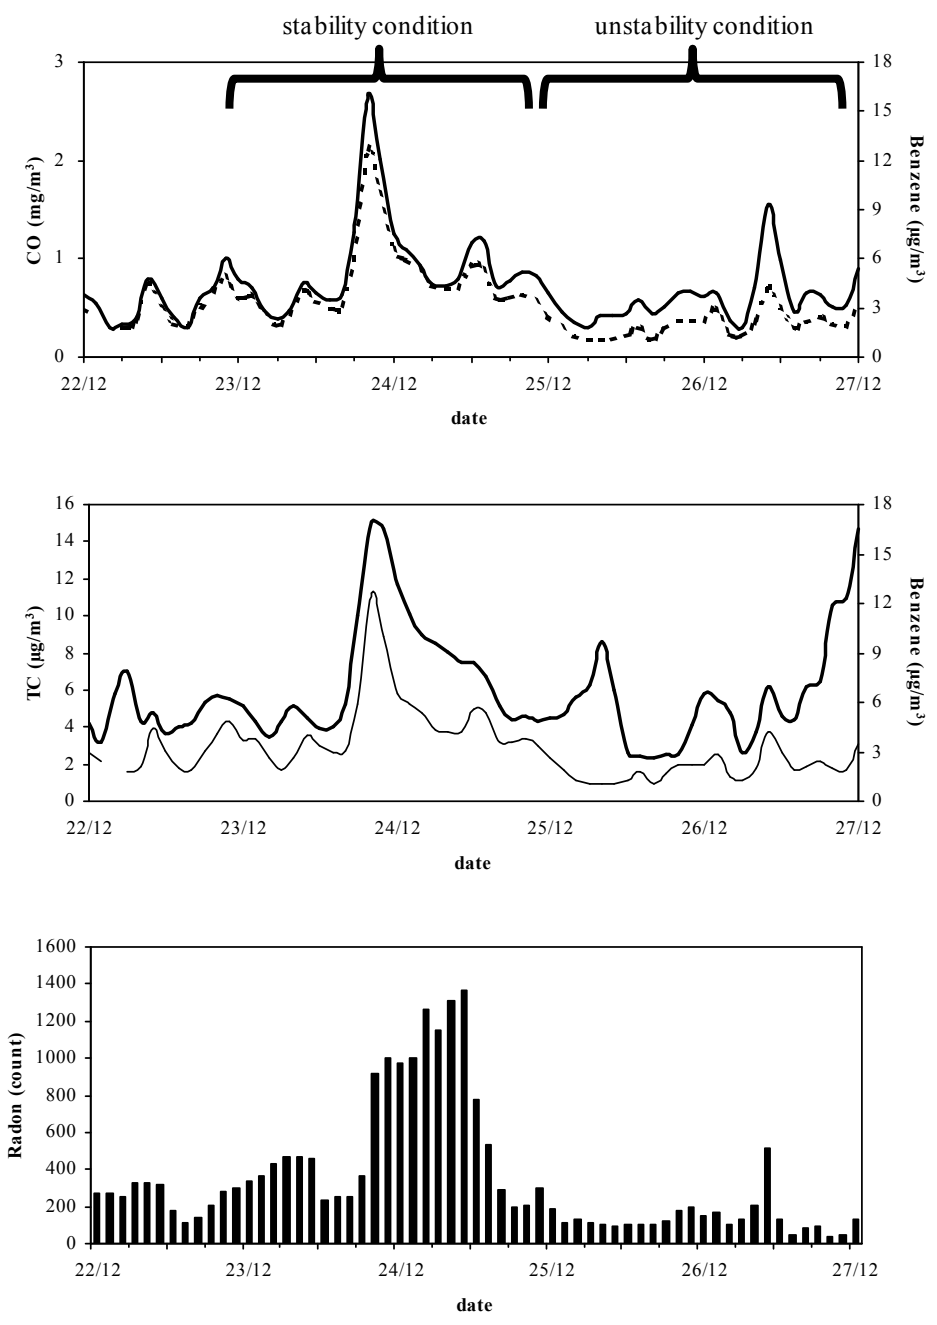

Supplement: c4em00471j1.pdf [file c4em00471j1.pdf]
